# Supplementary material for: Nickel – p-block metal mixed chalcogenides based on AuCu3-type fragments: iodine-assisted synthesis as a way of obtaining new structures
Source: Royal Society of Chemistry journal article supplement (doi:10.1039/d0dt03082a), 2020-01-01
Supplement: d0dt03082a1.pdf [file d0dt03082a1.pdf]

Electronic Supporting Information

for the manuscript

**Nickel - p-block Metal Mixed Chalcogenides Based on the AuCu<sub>3</sub>-type Fragments: Iodine-assisted Synthesis as a Way of Obtaining New Structures**

by

**Ekaterina A. Stroganova,<sup>[a]</sup> Sergey M. Kazakov,<sup>[a]</sup> Nikolay N. Efimov,<sup>[b]</sup> Victor N. Khrustalev,<sup>[c]</sup> Simon Keilholz,<sup>[d]</sup> Andre Götze,<sup>[d]</sup> Holger Kohlmann,<sup>[d]</sup> and Alexey N. Kuznetsov,<sup>[a,b]</sup>**

<sup>[a]</sup> Department of Chemistry, Lomonosov Moscow State University, Leninskie Gory 1-3, GSP-1, 119991 Moscow, Russian Federation

<sup>[b]</sup> N.S. Kurnakov Institute of General and Inorganic Chemistry, RAS, Leninsky pr. 31, GSP-1, 119991 Moscow, Russian Federation

<sup>[c]</sup> Joint Institute for Chemical Research, RUDN University, Miklukho-Maklaya str.6, 117198 Moscow, Russian Federation

<sup>[d]</sup> Inorganic Chemistry, Faculty for Chemistry and Mineralogy, Leipzig University, Johannisallee 29, 04103 Leipzig, Germany

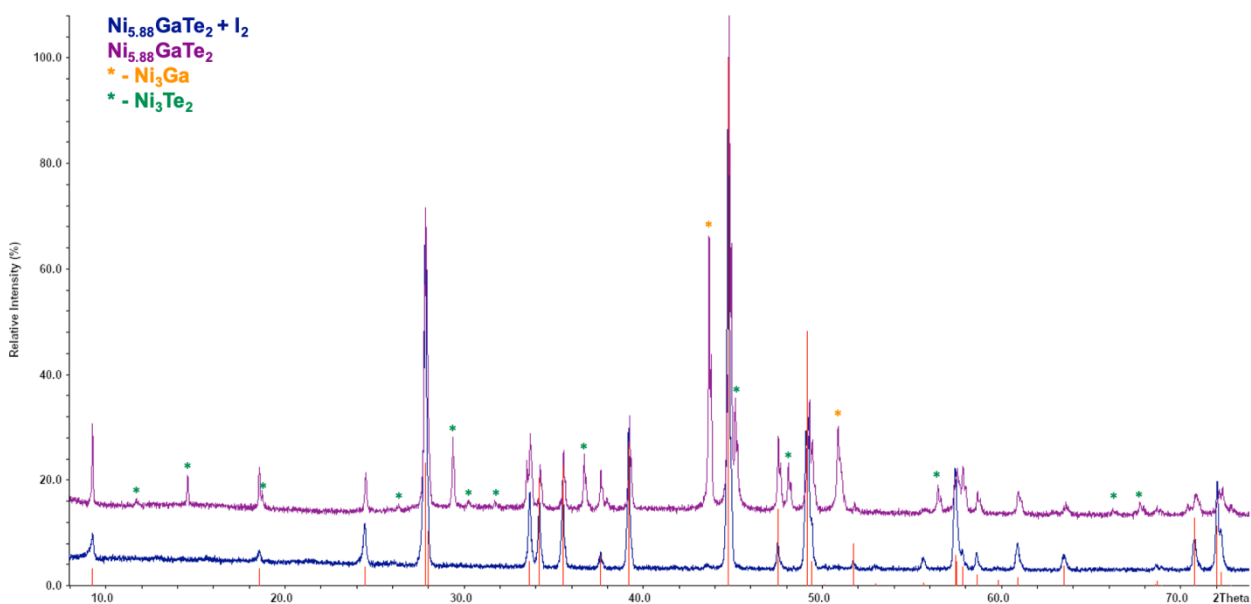

**Figure S1.** The effect of iodine on phase purity of Ni<sub>5.80</sub>GaTe<sub>2</sub>.

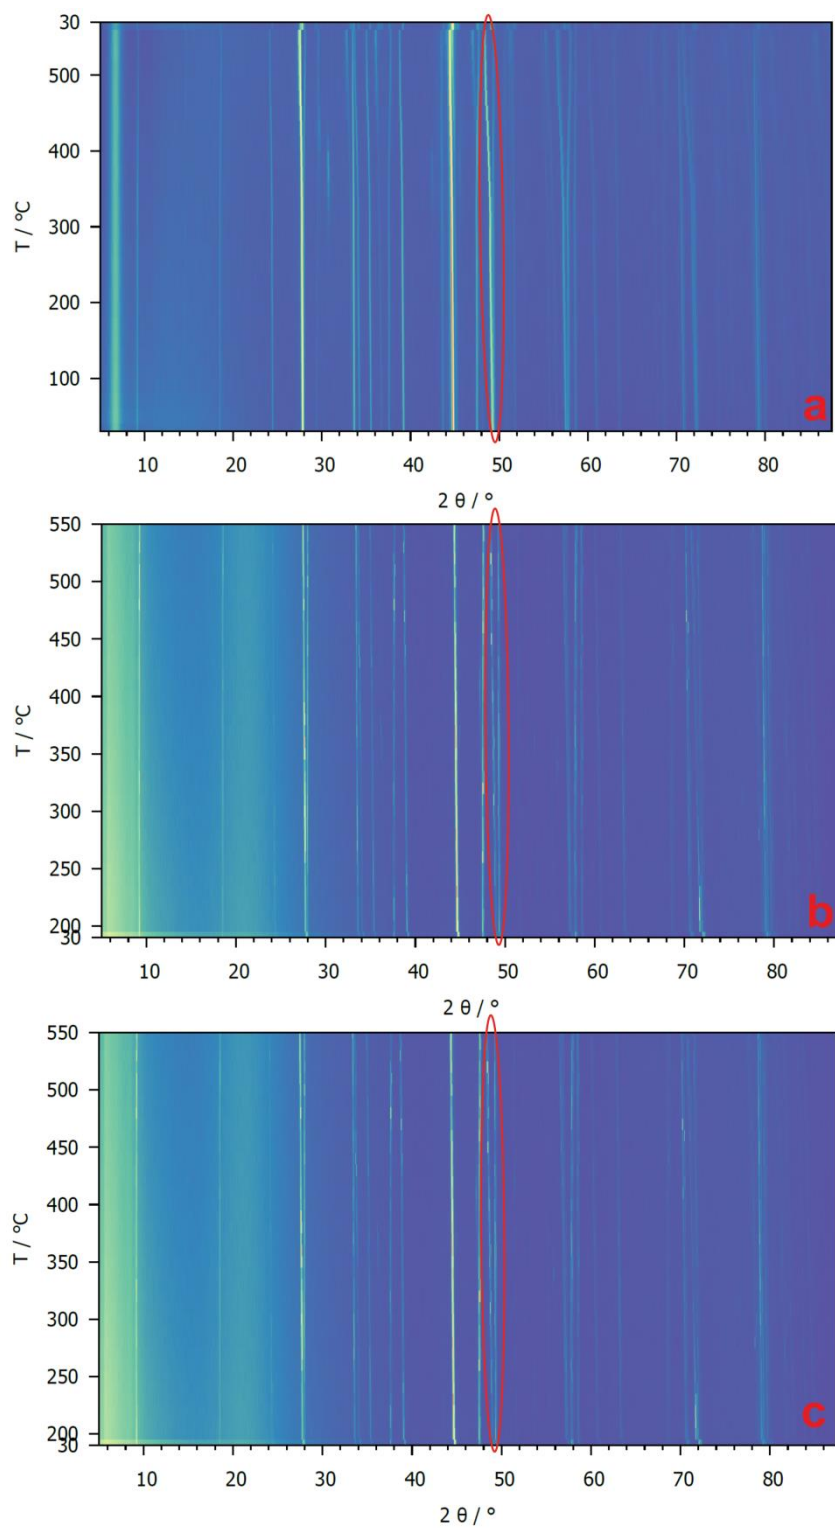

**Figure S2.** 2D in situ XRD patterns for  $\text{Ni}_{5.80}\text{GaTe}_2$ : a – flat sample under  $\text{N}_2$  atmosphere, b – pressurized (750 Torr) capillary under  $\text{N}_2$  atmosphere, c - pressurized capillary under ca. 53 kTorr  $\text{H}_2$  atmosphere. Red ellipse encircles the 200 – 020 pair of reflections.

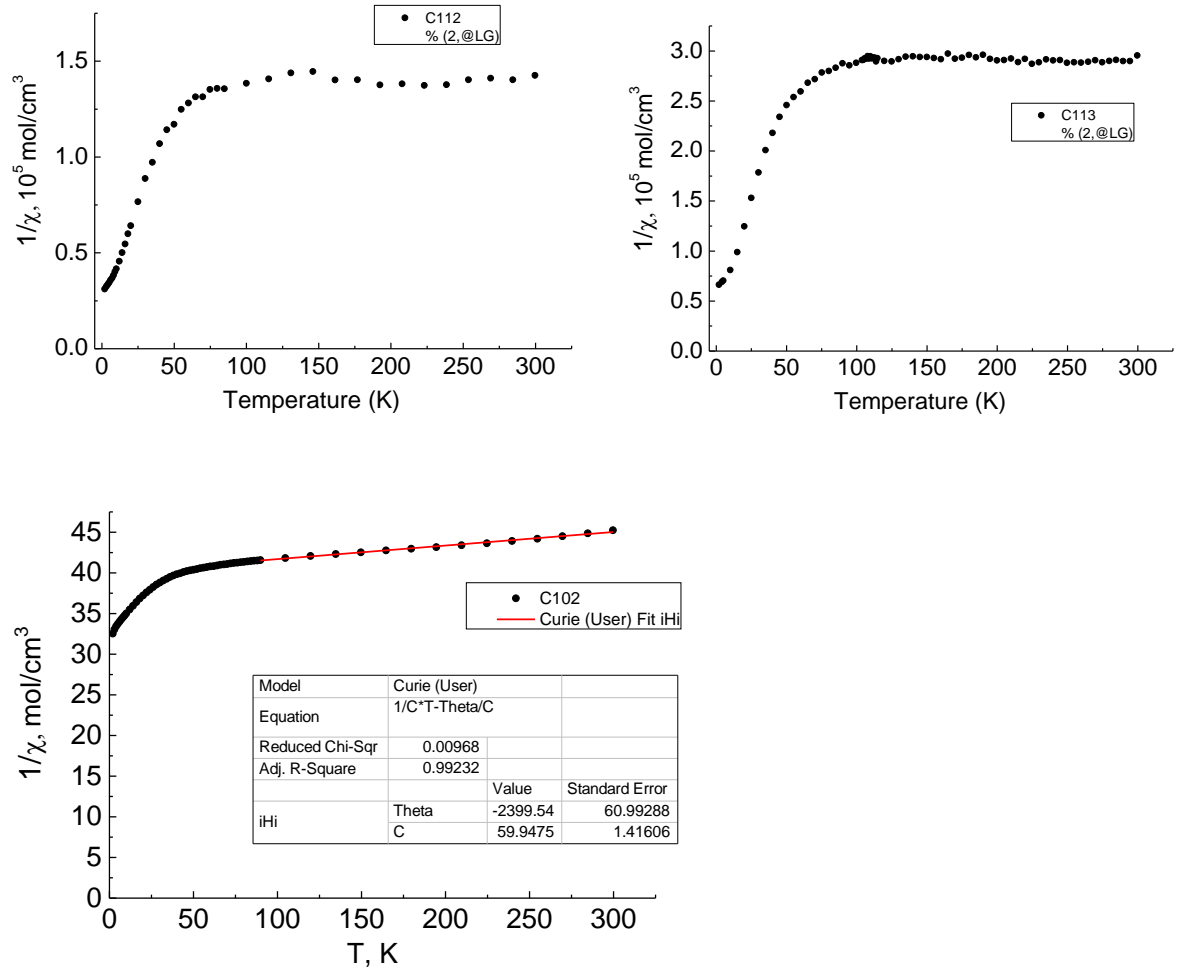

**Figure S3.** Temperature dependences of  $1/\chi$  for  $\text{Ni}_{5.80}\text{GaTe}_2$  (top left),  $\text{Ni}_{9.39}\text{Ga}_2\text{S}_2$  (top right), and  $\text{Ni}_{5.78}\text{InTe}_2$ .

**Table S1.** Atomic coordinates and ADPs for  $\text{Ni}_{5.80}\text{GaTe}_2$  based on the synchrotron single-crystal data.

| Atom  | Wyckoff site | $x/a$ | $y/b$ | $z/c$       | S.O.F.    | $U_{\text{iso}}, \text{\AA}^2$ |
|-------|--------------|-------|-------|-------------|-----------|--------------------------------|
| Ni(1) | 8g           | 1/2   | 1/2   | 0.41082(10) | 1         | 0.0187(7)                      |
| Ni(2) | 2b           | 1/2   | 1/2   | 1/2         | 1         | 0.0174(9)                      |
| Ni(3) | 4e           | 1/2   | 1/2   | 0.1897(4)   | 0.397(16) | 0.024(3)                       |
| Ga    | 2a           | 0     | 0     | 1/2         | 1         | 0.0184(8)                      |
| Te    | 4e           | 1/2   | 1/2   | 0.32036(6)  | 1         | 0.0190(6)                      |
